# Supplementary material
Source: PubMed Central journal article supplement (PMC10930804)
Supplement: i1537-2073-26-2-61-S1.pdf [file i1537-2073-26-2-61-S1.pdf]

**Figure S1.** Mean Change of Baseline

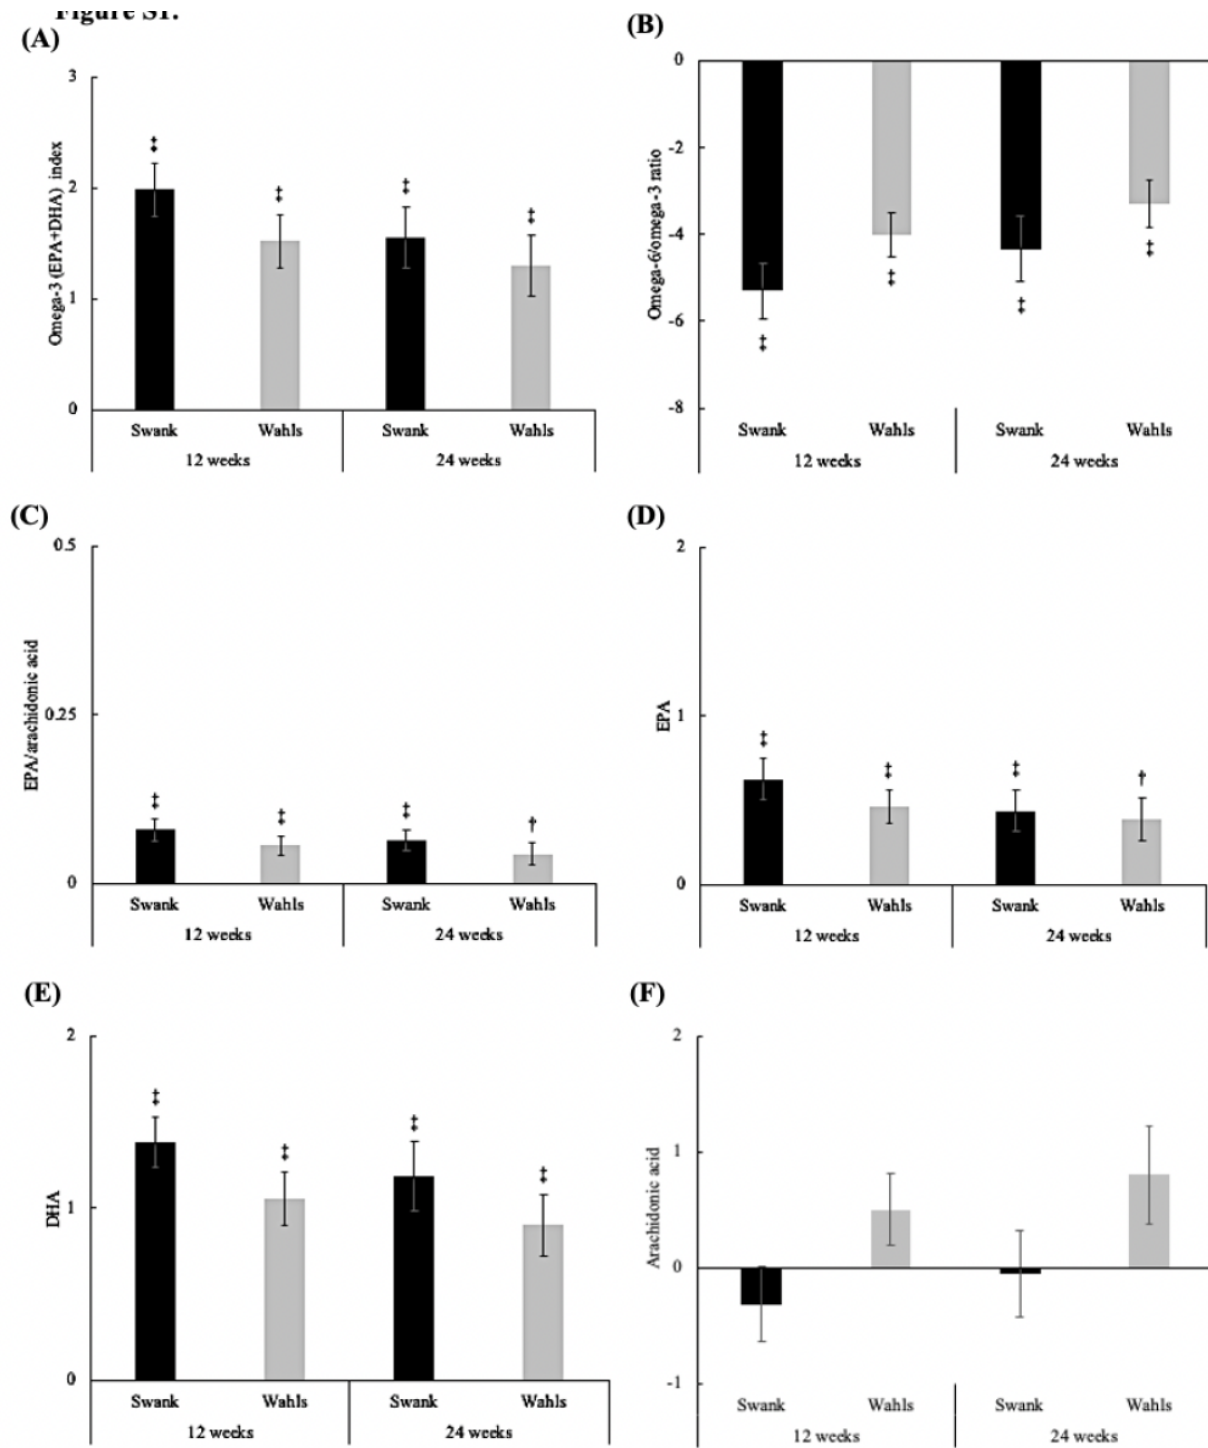

A) Omega-3 (EPA + DHA) Index, (B) Omega-6/omega-3 ratio, (C) EPA/ARA ratio, (D) EPA, (E) DHA, and (F) ARA, arachidonic acid; DHA, docosahexaenoic acid; EPA, eicosapentaenoic acid; PDQ, Perceived Deficits Questionnaire; SDMT-O, Symbol Digit Modalities Test-Oral. Note: \* =  $P \leq .05$ ; † =  $P \leq .01$ ; ‡ =  $P \leq .001$

**Table S1.** Baseline Participant Characteristics at 12-Week Primary Study End Point

| <b>Characteristics<sup>a</sup></b>   | <b>Swank</b> | <b>Wahls</b> | <b>P value<sup>b</sup></b> |
|--------------------------------------|--------------|--------------|----------------------------|
| <b>N</b>                             | 38           | 39           |                            |
| <b>Age (y)</b>                       | 46.9 ± 1.7   | 46.4 ± 1.5   | .84                        |
| <b>Sex (female)</b>                  | 35 (92.1)    | 32 (82.1)    | .31                        |
| <b>MS duration (y)</b>               | 12.1 ± 1.6   | 9.3 ± 1.0    | .14                        |
| <b>DMT use</b>                       |              |              | .83                        |
| None                                 | 13           | 10           |                            |
| Oral                                 | 11           | 11           |                            |
| Injectable                           | 10           | 12           |                            |
| Infused                              | 4            | 6            |                            |
| <b>Race (White)</b>                  | 36 (94.7)    | 38 (97.4)    | .99                        |
| <b>Education</b>                     |              |              | .32                        |
| High school                          | 0 (0.0)      | 3 (7.7)      |                            |
| Some college                         | 12 (31.6)    | 10 (25.6)    |                            |
| 4-year degree                        | 11 (28.9)    | 8 (20.5)     |                            |
| Advanced degree                      | 15 (39.5)    | 18 (46.2)    |                            |
| <b>Smoking status</b>                |              |              | .13                        |
| Never                                | 29 (76.3)    | 23 (59.0)    |                            |
| Former                               | 3 (7.9)      | 2 (5.1)      |                            |
| Current                              | 6 (15.8)     | 14 (35.9)    |                            |
| <b>Alcohol per month<sup>c</sup></b> |              |              | .99                        |
| None                                 | 6 (15.8)     | 7 (17.9)     |                            |
| Within recommendations               | 29 (76.3)    | 29 (74.4)    |                            |
| Above recommendation                 | 3 (7.9)      | 3 (7.7)      |                            |
| <b>PDQ total score</b>               | 32.4 (2.4)   | 35.9 (2.2)   | .28                        |
| Attention                            | 71.9 (2.9)   | 64.8 (3.5)   | .12                        |
| Retrospective memory                 | 9.15 (0.7)   | 9.5 (0.6)    | .66                        |
| Prospective memory                   | 8.00 (0.7)   | 8.9 (0.6)    | .31                        |
| Planning                             | 6.2 (0.6)    | 7.3 (0.6)    | .22                        |
| <b>SDMT-O</b>                        | 60.4 (1.5)   | 61.2 (1.5)   | .71                        |

---

DMT, disease-modifying therapy; MS, multiple sclerosis; PDQ, Perceived Deficits Questionnaire; SDMT-O, Symbol Digit Modalities Test-Oral.

<sup>a</sup>All values shown in mean  $\pm$  SEM or N (%). Data adapted.<sup>6</sup>

<sup>b</sup>Significance determined by Fisher's exact test or generalized linear models.

<sup>c</sup>Alcohol recommendations are less than or equal to 1 standard drink for women and less than or equal to 2 standard drinks for men.

**Table S2.** Association of 12-Week Serum Fatty Acid Changes with PDQ Subscore Changes

|                          | PDQ attention                                 |                | PDQ retrospective memory         |                | PDQ prospective memory           |                | PDQ planning memory              |                |
|--------------------------|-----------------------------------------------|----------------|----------------------------------|----------------|----------------------------------|----------------|----------------------------------|----------------|
|                          | $\beta$ -coefficient <sup>a</sup><br>(95% CI) | <i>P</i> value | $\beta$ -coefficient<br>(95% CI) | <i>P</i> value | $\beta$ -coefficient<br>(95% CI) | <i>P</i> value | $\beta$ -coefficient<br>(95% CI) | <i>P</i> value |
| Omega-3 (EPA +DHA) index | -2.18<br>(-7.00, 2.63)                        | 0.37           | -0.07<br>(-5.65, 5.79)           | 0.98           | 0.43<br>(-3.60, 4.47)            | 0.83           | -0.89<br>(-6.58, 4.81)           | 0.76           |
| Omega-6/omega-3 ratio    | 1.71<br>(-0.81, 4.23)                         | 0.18           | 0.47<br>(2.42, 3.46)             | 0.75           | 0.21<br>(-1.87, 2.30)            | 0.84           | 0.38<br>(-2.55, 3.32)            | 0.80           |
| EPA                      | -5.60<br>(-16.1, 4.90)                        | 0.29           | 3.35<br>(-8.92, 15.6)            | 0.59           | 2.29<br>(-6.30, 10.9)            | 0.60           | 0.54<br>(-11.8, 12.9)            | 0.93           |
| DHA                      | -2.96<br>(-10.8, 4.91)                        | 0.46           | -1.22<br>(-10.1, 7.70)           | 0.79           | 3.21<br>(-5.19, 7.61)            | 0.71           | -0.95<br>(-9.88, 7.98)           | 0.83           |
| EPA/ARA ratio            | -54.67<br>(-133, 23.3)                        | 0.17           | -6.74<br>(-97.0, 83.5)           | 0.88           | -0.00<br>(-64.8, 64.8)           | 1              | -26.3<br>(-113, 60.8)            | 0.55           |
| ARA                      | -0.38<br>(-4.47, 3.71)                        | 0.85           | -0.36<br>(-4.2, 4.9)             | 0.87           | 0.77<br>(-2.6, 4.1)              | 0.65           | 0.32<br>(-4.40, 5.05)            | 0.89           |

ARA, arachidonic acid; DHA, docosahexaenoic acid; EPA, eicosapentaenoic acid; PDQ, Perceived Deficits Questionnaire.

<sup>a</sup>The  $\beta$ -coefficient is the degree of change in the outcome variable for every 1 unit of change in the independent variable. The *t* test assesses whether the beta coefficient is statistically and significantly different from zero.

**Table S3.** Mediation Effect of 12-Week Serum Fatty Acid Changes on PDQ Subscores

|                           | <b>PDQ attention</b>         |                | <b>PDQ retrospective memory</b> |                | <b>PDQ prospective memory</b> |                | <b>PDQ planning memory</b>   |                |
|---------------------------|------------------------------|----------------|---------------------------------|----------------|-------------------------------|----------------|------------------------------|----------------|
|                           | Percent mediated<br>(95% CI) | <i>P</i> value | Percent mediated<br>(95% CI)    | <i>P</i> value | Percent mediated<br>(95% CI)  | <i>P</i> value | Percent mediated<br>(95% CI) | <i>P</i> value |
| Omega-3 (EPA + DHA) index | 11.9<br>(-33.9, 57.6)        | 0.61           | 5.35<br>(-45.3, 56.0)           | 0.84           | -0.04<br>(-55.4, 55.3)        | 0.99           | -1.35<br>(-49.8, 47.1)       | 0.96           |
| Omega-6/omega-3 ratio     | 38.5<br>(-30.9, 108)         | 0.28           | 22.6<br>(-56.5, 101.7)          | 0.58           | 18.5<br>(-66.3, 103.3)        | 0.67           | 9.59<br>(-61.8, 81.0)        | 0.79           |
| EPA                       | 6.99<br>(-25.4, 39.4)        | 0.67           | 2.36<br>(-35.7, 40.4)           | 0.90           | -4.53<br>(-45.7, 36.6)        | 0.83           | 1.87<br>(-33.03, 36.8)       | 0.92           |
| DHA                       | 17.3<br>(-32.7, 67.2)        | 0.50           | 22.4<br>(-37.3, 82.2)           | 0.46           | 3.62<br>(-58.6, 65.8)         | 0.91           | -2.14<br>(-55.1, 50.8)       | 0.94           |
| EPA/ARA ratio             | 15.6<br>(-13.4, 44.6)        | 0.29           | 15.8<br>(-16.2, 47.9)           | 0.33           | 8.68<br>(-28.8, 46.2)         | 0.65           | 12.50<br>(-18.5, 43.5)       | 0.43           |
| ARA                       | -0.34<br>(-4.42, 3.74)       | 0.87           | -0.47<br>(-6.08, 5.13)          | 0.87           | -0.37<br>(-4.85, 4.11)        | 0.87           | -3.39<br>(-5.08, 4.30)       | 0.87           |

ARA, arachidonic acid; DHA, docosahexaenoic acid; EPA, eicosapentaenoic acid; PDQ, Perceived Deficits Questionnaire.
